# Supplementary material for: Composition and Electronic Structure of La2O3/CNFs@C Core-Shell Nanoparticles with Variable Oxygen Content
Source: MDPI journal article supplement (doi:10.3390/nano13222945), 2023-11-14
Supplement: s1 [file s1]

## Supplementary materials

# Composition and Electronic Structure of $\text{La}_2\text{O}_3/\text{CNFs@C}$ Core-Shell Nanoparticles with Variable Oxygen Content

Evgeniya V. Suslova <sup>1,\*</sup>, Alexander N. Ulyanov <sup>1</sup>, Alexey P. Kozlov <sup>1</sup>, Denis A. Shashurin <sup>2</sup>,  
Serguei V. Savilov <sup>1</sup> and Georgy A. Chelkov <sup>3</sup>

<sup>1</sup> Department of Chemistry, Lomonosov Moscow State University, 119991 Moscow, Russia

<sup>2</sup> Faculty of Medicine, Lomonosov Moscow State University, 119991 Moscow, Russia

<sup>3</sup> Joint Institute for Nuclear Research, 141980 Dubna, Russia

\* Correspondence: suslova@kge.msu.ru

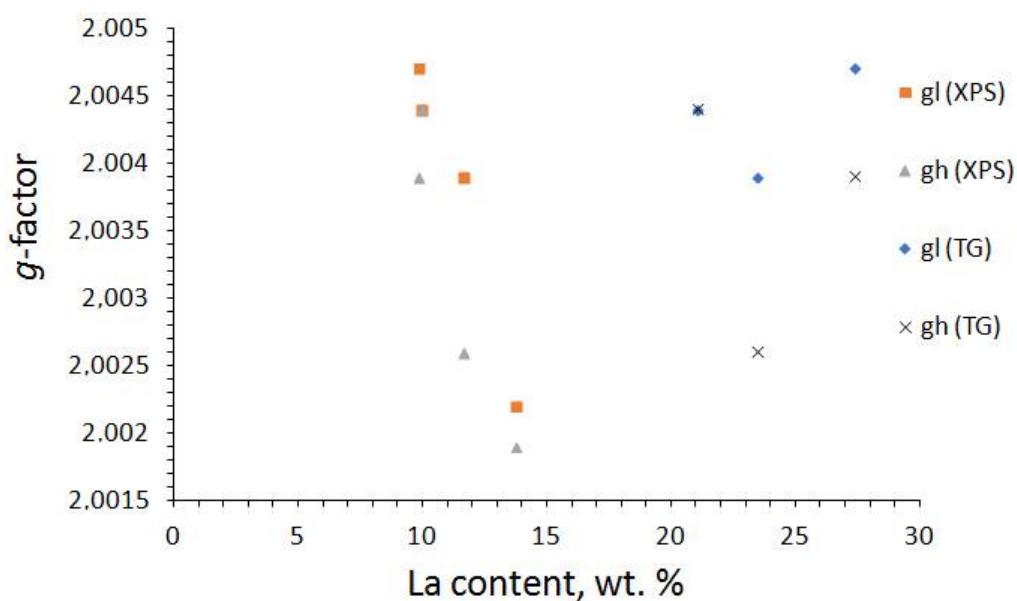

**Figure S1.** Correlations between  $g_l$ ,  $g_h$ , surface (TG) and bulk (XPS) La content.
